# Supplementary material
Source: Springer Nature journal article supplement (https://www.springermedizin.de/resource/supplementary/12916_2010_366_MOESM1_ESM.pdf/9599802)
Supplement: MOESM1 [file 9599802]

Time series

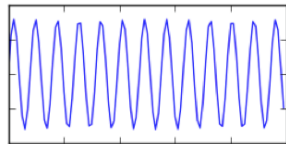

sine

Multiscale Entropy

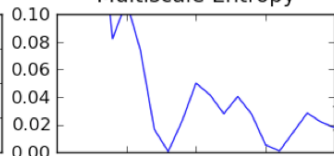

Time Asymmetry

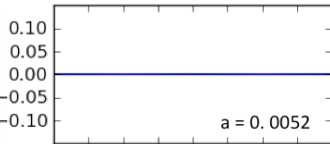 $a = 0.0052$ 

white noise

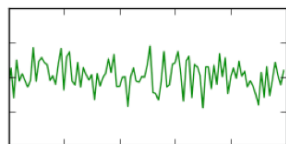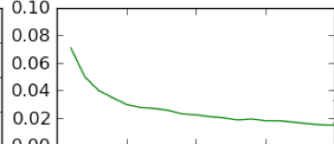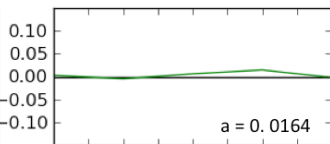 $a = 0.0164$ 

logistic

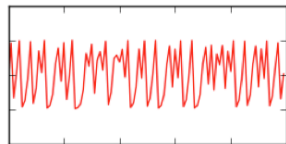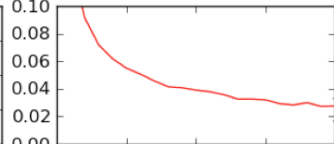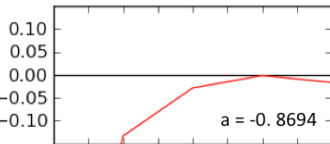 $a = -0.8694$ 

power law noise

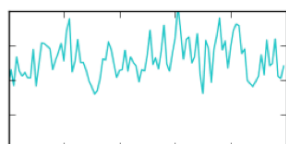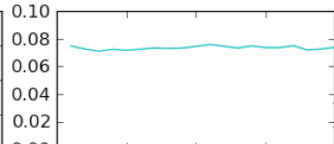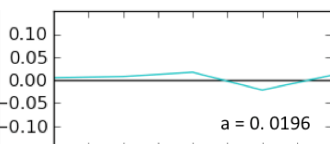 $a = 0.0196$ 

EEG

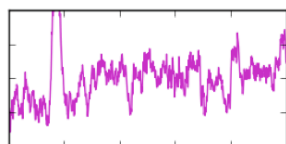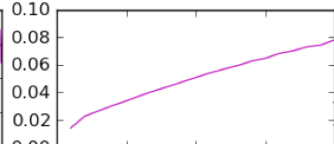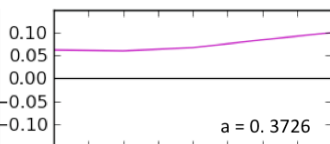 $a = 0.3726$
